# Supplementary material for: A Weakly Supervised Deep Learning Model and Human–Machine Fusion for Accurate Grading of Renal Cell Carcinoma from Histopathology Slides
Source: MDPI journal article supplement (doi:10.3390/cancers15123198), 2023-06-15
Supplement: s1 [file s1]

## Supplementary Materials

**Supplementary Table S1a. Dataset distribution of patients and corresponding images in the SSL-CLAM model.**

|              |          | Total  | Grade-0 | Grade-1 | Grade-2 | Grade-3 | Grade-4 |
|--------------|----------|--------|---------|---------|---------|---------|---------|
|              | Patients | images | images  | images  | images  | images  | images  |
| TCGA Cohort  | 504      | 764    | 199     | 14/70*  | 218     | 203     | 74      |
| CPTAC Cohort | 188      | 445    | 138     | 28      | 130     | 114     | 35      |

\* The number of Gade-1 images from TCGA after data argumentation.

**Supplementary Table S1b. Dataset distribution of images in the training, internal validation, and external validation sets.**

|          | TCGA Cohort  |                         | CPTAC Cohort            |
|----------|--------------|-------------------------|-------------------------|
|          | Training set | Internal validation set | External validation set |
| SSL-CLAM | 611          | 153                     | 445                     |
